# Supplementary material for: Parity and Longevity of Aedes aegypti According to Temperatures in Controlled Conditions and Consequences on Dengue Transmission Risks
Source: PubMed Central journal article supplement (PMC4530937; doi:10.1371/journal.pone.0135489), 2015-08-10
Supplement: pone.0135489.s001.pdf [file pone.0135489.s001.pdf]

## ANOVA one way statistical test

H0 : Temperature has no influence on duration of gonotrophic cycle

Mean duration of gonotrophic cycle 1

|    | 24°C  | 27°C  | 30°C |
|----|-------|-------|------|
| 1  | 9,67  | 8,5   | 4    |
| 2  | 9     | 9,67  | 7    |
| 3  | 13,67 | 5,5   | 5    |
| 4  | 8,5   | 8,75  | 5,5  |
| 5  | 9     | 8     | 4,5  |
| 6  | 10,5  | 13    | 5    |
| 7  | 9     | 7,5   | 8,33 |
| 8  | 9     | 11    | 5    |
| 9  | 15,33 | 16    | 7    |
| 10 | 10    | 16    | 6    |
| 11 | 9     | 9,25  | 6,5  |
| 12 | 8     | 8     | 6    |
| 13 | 10,33 | 5     | 7,33 |
| 14 | 10,33 | 9,33  | 4    |
| 15 | 8     | 11    | 4    |
| 16 | 14    | 9,71  | 4    |
| 17 | 13    | 22    | 5    |
| 18 | 10,33 | 10,67 | 6    |
| 19 | 7     | 13,33 | 5    |
| 20 | 13,33 | 20    | 6    |
| 21 | 8,5   | 15    | 5    |
| 22 | 8     | 14,5  | 6    |
| 23 | 7     | 11    | 7    |
| 24 | 13,4  | 5     | 4    |
| 25 | 21    | 5     | 10   |
| 26 | 11    | 8,67  | 5    |
| 27 | 8     | 5     | 5,5  |
| 28 | 8,5   | 4     | 5    |
| 29 | 13    | 5     | 4    |
| 30 |       | 11,25 | 6    |
| 31 |       | 7,75  | 5    |
| 32 |       | 3     | 5    |
| 33 |       | 7     | 5    |
| 34 |       | 8     | 6    |
| 35 |       | 12    | 6    |
| 36 |       | 6     | 4,5  |
| 37 |       | 10    | 5    |
| 38 |       | 11    | 5,5  |
| 39 |       | 5     | 5    |
| 40 |       | 9     | 7    |
| 41 |       | 5     | 6,5  |
| 42 |       | 6,5   | 6,5  |
| 43 |       | 7     | 6    |
| 44 |       | 7     | 4    |
| 45 |       | 6     | 5,5  |
| 46 |       | 15,57 | 7    |
| 47 |       | 6     | 5,5  |
| 48 |       | 6     | 5,5  |
| 49 |       | 11,25 | 5    |
| 50 |       | 5     | 5    |
| 51 |       | 13    | 5    |
| 52 |       | 8     | 5    |
| 53 |       | 16    | 7    |
| 54 |       | 6     | 5    |
| 55 |       | 7     | 6    |
| 56 |       | 4     | 6    |
| 57 |       | 4,5   | 5    |
| 58 |       | 8     | 5    |
| 59 |       | 9,25  | 5    |
| 60 |       | 9,5   | 5    |
| 61 |       |       | 8    |

Mean duration of gonotrophic cycle 2

|  | 24°C | 27°C | 30°C |
|--|------|------|------|
|  | 7    | 9    | 4    |
|  | 8    | 4,5  | 4    |
|  | 9    | 3    | 4    |
|  | 8    | 5    | 3,5  |
|  | 5    | 10   | 4    |
|  | 5    | 7    | 4    |
|  | 7,33 | 5    | 6,5  |
|  | 11,5 | 3    | 6,67 |
|  |      | 5    | 4    |
|  |      | 11,5 | 4    |
|  |      | 8,5  | 9,67 |
|  |      | 10,5 | 6    |
|  |      | 8,67 | 4    |
|  |      | 2    | 4    |
|  |      | 4,5  | 7    |
|  |      | 6    | 6    |
|  |      | 8,5  | 4    |
|  |      | 13,6 | 6,75 |
|  |      | 8    | 4    |
|  |      | 6    | 4    |
|  |      | 9,67 | 4    |
|  |      | 9    | 7,33 |
|  |      | 8    | 4    |
|  |      | 6    | 7    |
|  |      | 6,5  |      |
|  |      | 6    |      |
|  |      | 9    |      |

|            |         |         |         |         |
|------------|---------|---------|---------|---------|
| Ti         | 60,83   | 193,44  | 122,42  | 376,69  |
| ni         | 8       | 27      | 24      | 59      |
| xi barre   | 7,60375 | 7,16444 | 5,10083 | 19,869  |
| Ti carré   | 3700,29 | 37419   | 14986,7 | 56106   |
| Ti carré/r | 462,536 | 1385,89 | 624,444 | 2472,87 |

SCI = 67,8642

SCT = 359,15

SCE = SCT-SCI  
SCE = 291,286

Vc = SCI/k-1  
Vc = 33,9321

Ve = SCE/n-k  
Ve = 5,20153

F = Vc/Ve  
F = 6,52349

3,15 < F alpha < 3,18 d'où F > F alpha: We can't accept H0

|            |         |         |         |         |
|------------|---------|---------|---------|---------|
| Ti         | 305,39  | 545,95  | 341,16  | 1192,5  |
| ni         | 29      | 60      | 61      | 150     |
| xi barre   | 10,5307 | 9,09917 | 5,59279 | 25,2226 |
| Ti carré   | 93263,1 | 298061  | 116390  | 507715  |
| Ti carré/r | 3215,97 | 4967,69 | 1908,04 | 10091,7 |

SCI = 611,318

SCT = 1909,85

SCE = SCT-SCI  
SCE = 1298,54

Vc = SCI/k-1  
Vc = 305,659

Ve = SCE/n-k  
Ve = 8,83358

F = Vc/Ve  
F = 34,6019

F 0,05 (2; 3,06

F > F alpha: we can't accept H0
