# Supplementary material for: Parity and Longevity of Aedes aegypti According to Temperatures in Controlled Conditions and Consequences on Dengue Transmission Risks
Source: PubMed Central journal article supplement (PMC4530937; doi:10.1371/journal.pone.0135489), 2015-08-10
Supplement: pone.0135489.s002.pdf [file pone.0135489.s002.pdf]

**ANOVA one way statistical test**

H0 : Temperature has no influence on the number of eggs

**Mean number of eggs per female**

|    | 24°C | 27°C  | 30°C |
|----|------|-------|------|
| 1  | 34   | 58    | 18   |
| 2  | 36,5 | 40    | 8    |
| 3  | 53   | 33,67 | 57   |
| 4  | 57,5 | 56    | 51,5 |
| 5  | 40   | 19    | 38   |
| 6  | 67   | 1     | 30   |
| 7  | 38   | 18,5  | 32   |
| 8  | 72   | 14    | 39,5 |
| 9  | 58   | 29    | 14   |
| 10 | 48   | 6     | 12   |
| 11 | 67,5 | 51    | 30,5 |
| 12 | 28   | 100   | 42   |
| 13 | 47,5 | 51    | 44   |
| 14 | 52   | 50    | 58   |
| 15 | 21   | 46    | 33   |
| 16 | 77   | 58    | 57   |
| 17 | 53   | 70    | 37   |
| 18 | 22   | 23,5  | 56   |
| 19 | 21   | 53    | 29   |
| 20 | 51   | 2     | 23   |
| 21 | 16   | 56    | 22,5 |
| 22 | 14   | 82    | 43   |
| 23 | 24   | 66,5  | 43   |
| 24 | 29   | 50,5  | 39   |
| 25 | 1    | 39    | 20   |
| 26 | 31   | 51    | 15   |
| 27 | 39   | 70    | 29,5 |
| 28 | 41   | 31,5  | 33   |
| 29 | 35   | 1     | 60   |
| 30 |      | 41    | 15   |
| 31 |      | 34    | 13   |
| 32 |      | 1     | 26   |
| 33 |      | 36    | 48   |
| 34 |      | 45    | 5    |
| 35 |      | 8     | 51   |
| 36 |      | 56    | 52,5 |
| 37 |      | 1     | 46   |
| 38 |      | 43    | 33   |
| 39 |      | 49    | 57   |
| 40 |      | 59    | 93   |
| 41 |      | 52,33 | 50,5 |
| 42 |      | 22    | 27   |
| 43 |      | 57    | 64,5 |
| 44 |      | 73    | 59,5 |
| 45 |      | 51    | 58   |
| 46 |      | 40    | 32   |
| 47 |      | 59,5  | 33,3 |
| 48 |      | 31    | 42   |
| 49 |      | 25    | 41,5 |
| 50 |      | 45,67 | 24   |
| 51 |      | 36    | 44   |
| 52 |      | 2     | 45   |
| 53 |      | 2     | 16   |
| 54 |      | 24    | 33   |
| 55 |      | 54,67 | 38,5 |
| 56 |      | 48,67 | 14   |
| 57 |      | 32,5  | 40   |
| 58 |      | 44    | 60   |
| 59 |      | 49    | 24   |
| 60 |      | 28    | 2    |
| 61 |      |       | 21   |

|             |            |            |            |
|-------------|------------|------------|------------|
| Ti          | 1174       | 2377,51    | 2223,8     |
| ni          | 29         | 60         | 61         |
| xi barre    | 40,4827586 | 39,6251667 | 36,4557377 |
| Ti carré    | 1378276    | 5652553,8  | 4945286,44 |
| Ti carré/ni | 47526,7586 | 94209,23   | 81070,2695 |

|            |
|------------|
| 5775,31    |
| 150        |
| 116,563663 |
| 11976116,2 |
| 222806,258 |

SCI = 444,88749

SCT = 57193,4439

SCE = 56748,5564

Vc = 222,443745

Ve = 386,044601

F = 0,57621255

**F < F alpha (3,00): we can't reject H0**
