# Supplementary material for: Parity and Longevity of Aedes aegypti According to Temperatures in Controlled Conditions and Consequences on Dengue Transmission Risks
Source: PubMed Central journal article supplement (PMC4530937; doi:10.1371/journal.pone.0135489), 2015-08-10
Supplement: pone.0135489.s003.pdf [file pone.0135489.s003.pdf]

| GC1   | GC2   |
|-------|-------|
| 41,69 | 44,38 |
| 42,62 | 32,59 |
| 39,43 | 34,21 |

XLSTAT 2014.6.01 - Comparaison de k échantillons (Kruskal-Wallis, Friedman, ...) - le 07/07/2015 à 14:54:52

Echantillons : Classeur = Supplementary-Files-S1toS8-PONE-01616vuDG.xlsx / Feuille = Table S6 / Plage = 'Table S6'!\$B\$1:\$C\$4 / 3 lignes et 2 colonnes

Niveau de signification (%) : 5

p-value : p-value asymptotique

Statistiques descriptives :

| Variable | Observations | Obs. avec données |   | Obs. sans données |  | Minimum | Maximum | Moyenne | Ecart-type |
|----------|--------------|-------------------|---|-------------------|--|---------|---------|---------|------------|
|          |              | manquantes        |   | manquantes        |  |         |         |         |            |
| GC1      | 3            |                   | 0 | 3                 |  | 39,430  | 42,620  | 41,247  | 1,641      |
| GC2      | 3            |                   | 0 | 3                 |  | 32,590  | 44,380  | 37,060  | 6,391      |

Test de Kruskal-Wallis :

|                      |       |
|----------------------|-------|
| K (Valeur observée)  | 0,429 |
| K (Valeur critique)  | 3,841 |
| DDL                  | 1     |
| p-value (bilatérale) | 0,513 |
| alpha                | 0,05  |

Une approximation a été utilisée pour calculer la p-value.

Interprétation du test :

H0 : Les échantillons proviennent de la même population.

Ha : Les échantillons proviennent de populations différentes.

Etant donné que la p-value calculée est supérieure au niveau de signification seuil  $\alpha=0,05$ , on ne peut pas rejeter l'hypothèse nulle H0.

Le risque de rejeter l'hypothèse nulle H0 alors qu'elle est vraie est de 51,27%.

Comparaisons multiples par paires suivant la procédure de Steel-Dwass-Critchlow-Fligner / Test bilatéral :

| Echantillon | Effectif | Somme des rangs | Moyenne des rangs | Groupes |
|-------------|----------|-----------------|-------------------|---------|
| GC2         | 3        | 9,000           | 3,000             | A       |
| GC1         | 3        | 12,000          | 4,000             | A       |

Wij :

|     | GC1    | GC2   |
|-----|--------|-------|
| GC1 |        | 0,926 |
| GC2 | -0,926 |       |

Différences significatives :

|     | GC1 | GC2 |
|-----|-----|-----|
| GC1 |     | Non |
| GC2 | Non |     |

p-values :

|     | GC1   | GC2   |
|-----|-------|-------|
| GC1 | 1     | 0,513 |
| GC2 | 0,513 | 1     |
