# Supplementary material for: Parity and Longevity of Aedes aegypti According to Temperatures in Controlled Conditions and Consequences on Dengue Transmission Risks
Source: PubMed Central journal article supplement (PMC4530937; doi:10.1371/journal.pone.0135489), 2015-08-10
Supplement: pone.0135489.s004.pdf [file pone.0135489.s004.pdf]

| 24°C | Days             | Nb of parous female x CG duration | Number of parous females | Cumulative number | Rate/29  | Rounded rates/29 | Rate/81   | Rounded rates/81 |
|------|------------------|-----------------------------------|--------------------------|-------------------|----------|------------------|-----------|------------------|
|      | 7                | 42                                | 6                        | 6                 | 0,206897 | 0,21             | 0,0740741 | 0,07             |
|      | 8                | 72                                | 9                        | 15                | 0,517241 | 0,52             | 0,1851852 | 0,19             |
|      | 9                | 90                                | 10                       | 25                | 0,862069 | 0,86             | 0,308642  | 0,31             |
|      | 11               | 22                                | 2                        | 27                | 0,931034 | 0,93             | 0,3333333 | 0,33             |
|      | 12               | 12                                | 1                        | 28                | 0,965517 | 0,97             | 0,345679  | 0,35             |
|      | 21               | 21                                | 1                        | 29                | 1        | 1                | 0,3580247 | 0,36             |
|      | Mean GC duration | <b>8,93</b>                       |                          |                   |          |                  |           |                  |
| 27°C | Days             |                                   | Number of parous females | Cumulative number | Rate/60  | Rounded rates/60 | Rate/85   | Rounded rates/85 |
|      | 3                | 3                                 | 1                        | 1                 | 0,016667 | 0,02             | 0,0117647 | 0,01             |
|      | 4                | 24                                | 6                        | 7                 | 0,116667 | 0,12             | 0,0823529 | 0,08             |
|      | 5                | 75                                | 15                       | 22                | 0,366667 | 0,37             | 0,2588235 | 0,26             |
|      | 6                | 54                                | 9                        | 31                | 0,516667 | 0,52             | 0,3647059 | 0,36             |
|      | 7                | 63                                | 9                        | 40                | 0,666667 | 0,67             | 0,4705882 | 0,47             |
|      | 8                | 72                                | 9                        | 49                | 0,816667 | 0,82             | 0,5764706 | 0,58             |
|      | 9                | 9                                 | 1                        | 50                | 0,833333 | 0,83             | 0,5882353 | 0,59             |
|      | 10               | 10                                | 1                        | 51                | 0,85     | 0,85             | 0,6       | 0,6              |
|      | 12               | 12                                | 1                        | 52                | 0,866667 | 0,87             | 0,6117647 | 0,61             |
|      | 13               | 26                                | 2                        | 54                | 0,9      | 0,9              | 0,6352941 | 0,64             |
|      | 14               | 28                                | 2                        | 56                | 0,933333 | 0,93             | 0,6588235 | 0,66             |
|      | 16               | 32                                | 2                        | 58                | 0,966667 | 0,97             | 0,6823529 | 0,68             |
|      | 20               | 20                                | 1                        | 59                | 0,983333 | 0,98             | 0,6941176 | 0,69             |
|      | 22               | 22                                | 1                        | 60                | 1        | 1                | 0,7058824 | 0,71             |
|      | Mean GC duration | <b>7,50</b>                       |                          |                   |          |                  |           |                  |
| 30°C | Days             |                                   | Number of parous females | Cumulative number | Rate/61  | Rounded rates/61 | Rate/95   | Rounded rates/95 |
|      | 4                | 44                                | 11                       | 11                | 0,180328 | 0,18             | 0,1157895 | 0,12             |
|      | 5                | 195                               | 39                       | 50                | 0,819672 | 0,82             | 0,5263158 | 0,53             |
|      | 6                | 24                                | 4                        | 54                | 0,885246 | 0,89             | 0,5684211 | 0,57             |
|      | 7                | 35                                | 5                        | 59                | 0,967213 | 0,97             | 0,6210526 | 0,62             |
|      | 8                | 8                                 | 1                        | 60                | 0,983607 | 0,98             | 0,6315789 | 0,63             |
|      | 10               | 10                                | 1                        | 61                | 1        | 1                | 0,6421053 | 0,64             |
|      | Mean GC duration | <b>5,18</b>                       |                          |                   |          |                  |           |                  |
