# Supplementary material for: Parity and Longevity of Aedes aegypti According to Temperatures in Controlled Conditions and Consequences on Dengue Transmission Risks
Source: PubMed Central journal article supplement (PMC4530937; doi:10.1371/journal.pone.0135489), 2015-08-10
Supplement: pone.0135489.s007.pdf [file pone.0135489.s007.pdf]

| 24°C          |                            |                 |                |              |           |         |               |        |       |       |                            |                 | 27°C           |              |           |          |               |        |       |       |                            |                 |                |              |           | 30°C    |               |        |       |       |  |  |  |  |  |  |  |  |
|---------------|----------------------------|-----------------|----------------|--------------|-----------|---------|---------------|--------|-------|-------|----------------------------|-----------------|----------------|--------------|-----------|----------|---------------|--------|-------|-------|----------------------------|-----------------|----------------|--------------|-----------|---------|---------------|--------|-------|-------|--|--|--|--|--|--|--|--|
| Model         |                            |                 |                |              |           |         |               |        |       |       |                            |                 | Model          |              |           |          |               |        |       |       |                            |                 |                |              |           | Model   |               |        |       |       |  |  |  |  |  |  |  |  |
| Days of study | Age of females             | Number of alive | Number of dead | Survival (s) | Mortality | D*F     | Life duration | p      | Age   | β     | Age of females             | Number of alive | Number of dead | Survival (s) | Mortality | D*F      | Life duration | p      | Age   | β     | Age of females             | Number of alive | Number of dead | Survival (s) | Mortality | D*F     | Life duration | p      | Age   | β     |  |  |  |  |  |  |  |  |
| 1             | 9                          | 67              | 2              | 1.00         | 0.00      | 17.470  | 22.1827       | 0.9559 | 1.00  | 0.935 | 14                         | 85              | 4              | 1.00         | 0.00      | 57.365   | 32.7882       | 0.9700 | 1.00  | 0.961 | 19                         | 95              | 1              | 1.00         | 0.00      | 18.874  | 27.5158       | 0.9643 | 1.00  | 0.913 |  |  |  |  |  |  |  |  |
| 2             | 10                         | 65              | 5              | 0.97         | 0.03      | 48.675  | 24.5965       | 0.9567 | 2.00  | 0.942 | 15                         | 81              | 5              | 0.95         | 0.05      | 76.706   | 33.6992       | 0.9708 | 2.00  | 0.964 | 20                         | 94              | 4              | 0.99         | 0.01      | 79.495  | 27.6707       | 0.9644 | 2.00  | 0.925 |  |  |  |  |  |  |  |  |
| 3             | 11                         | 60              | 9              | 0.90         | 0.10      | 96.614  | 24.6683       | 0.9586 | 4.00  | 0.950 | 16                         | 76              | 9              | 0.89         | 0.11      | 111.000  | 34.9070       | 0.9718 | 4.00  | 0.966 | 21                         | 90              | 4              | 0.95         | 0.05      | 83.495  | 27.9515       | 0.9649 | 4.00  | 0.937 |  |  |  |  |  |  |  |  |
| 4             | 12                         | 51              | 3              | 0.76         | 0.24      | 35.205  | 25.9526       | 0.9622 | 6.00  | 0.955 | 17                         | 76              | 3              | 0.89         | 0.11      | 52.024   | 34.9070       | 0.9718 | 6.00  | 0.968 | 22                         | 86              | 1              | 0.91         | 0.09      | 109.388 | 28.2007       | 0.9653 | 6.00  | 0.944 |  |  |  |  |  |  |  |  |
| 5             | 13                         | 48              | 4              | 0.72         | 0.28      | 50.940  | 26.8391       | 0.9634 | 8.00  | 0.958 | 18                         | 73              | 0              | 0.86         | 0.14      | 0.000    | 35.6288       | 0.9723 | 8.00  | 0.969 | 23                         | 81              | 15             | 0.85         | 0.15      | 343.105 | 28.6762       | 0.9657 | 8.00  | 0.949 |  |  |  |  |  |  |  |  |
| 6             | 14                         | 44              | 5              | 0.66         | 0.34      | 68.675  | 28.1213       | 0.9651 | 10.00 | 0.960 | 19                         | 73              | 0              | 0.86         | 0.14      | 0.000    | 35.6288       | 0.9723 | 10.00 | 0.970 | 24                         | 66              | 6              | 0.69         | 0.31      | 143.242 | 29.9949       | 0.9672 | 10.00 | 0.952 |  |  |  |  |  |  |  |  |
| 7             | 15                         | 39              | 1              | 0.98         | 0.02      | 14.735  | 29.9557       | 0.9672 | 12.00 | 0.962 | 20                         | 73              | 1              | 0.86         | 0.14      | 20.341   | 35.6288       | 0.9723 | 12.00 | 0.970 | 25                         | 60              | 7              | 0.63         | 0.37      | 174.116 | 30.6670       | 0.9679 | 12.00 | 0.956 |  |  |  |  |  |  |  |  |
| 8             | 16                         | 38              | 1              | 0.97         | 0.03      | 15.735  | 30.3665       | 0.9676 | 14.00 | 0.964 | 21                         | 72              | 1              | 0.85         | 0.15      | 21.341   | 35.8412       | 0.9725 | 14.00 | 0.971 | 26                         | 53              | 9              | 0.56         | 0.44      | 232.863 | 31.3643       | 0.9686 | 14.00 | 0.958 |  |  |  |  |  |  |  |  |
| 9             | 17                         | 37              | 0              | 0.95         | 0.05      | 0.000   | 30.7620       | 0.9680 | 16.00 | 0.965 | 22                         | 71              | 0              | 0.84         | 0.16      | 0.000    | 36.0454       | 0.9726 | 16.00 | 0.971 | 27                         | 40              | 2              | 0.46         | 0.54      | 53.747  | 32.4873       | 0.9697 | 16.00 | 0.961 |  |  |  |  |  |  |  |  |
| 10            | 18                         | 37              | 1              | 0.95         | 0.05      | 17.735  | 30.7620       | 0.9680 | 18.00 | 0.967 | 23                         | 71              | 0              | 0.84         | 0.16      | 0.000    | 36.0454       | 0.9726 | 18.00 | 0.972 | 28                         | 42              | 13             | 0.44         | 0.56      | 362.358 | 32.7546       | 0.9699 | 18.00 | 0.963 |  |  |  |  |  |  |  |  |
| 11            | 19                         | 36              | 1              | 0.94         | 0.06      | 18.735  | 31.1728       | 0.9684 | 20.00 | 0.968 | 24                         | 71              | 0              | 0.84         | 0.16      | 0.000    | 36.0454       | 0.9726 | 20.00 | 0.972 | 29                         | 29              | 3              | 0.31         | 0.69      | 86.621  | 34.9626       | 0.9718 | 20.00 | 0.964 |  |  |  |  |  |  |  |  |
| 12            | 20                         | 35              | 0              | 0.92         | 0.08      | 0.000   | 31.4778       | 0.9687 | 22.00 | 0.969 | 25                         | 71              | 4              | 0.84         | 0.16      | 101.365  | 36.0454       | 0.9726 | 22.00 | 0.973 | 30                         | 26              | 4              | 0.27         | 0.71      | 119.495 | 35.6429       | 0.9723 | 22.00 | 0.966 |  |  |  |  |  |  |  |  |
| 13            | 21                         | 35              | 1              | 0.92         | 0.08      | 20.735  | 31.4778       | 0.9687 | 24.00 | 0.970 | 26                         | 67              | 3              | 0.79         | 0.21      | 79.024   | 36.6845       | 0.9731 | 24.00 | 0.973 | 31                         | 22              | 1              | 0.23         | 0.77      | 30.874  | 36.6919       | 0.9731 | 24.00 | 0.968 |  |  |  |  |  |  |  |  |
| 14            | 22                         | 34              | 0              | 0.91         | 0.09      | 0.000   | 31.7938       | 0.9690 | 26.00 | 0.971 | 27                         | 64              | 0              | 0.75         | 0.25      | 0.000    | 37.1693       | 0.9735 | 26.00 | 0.973 | 32                         | 22              | 2              | 0.22         | 0.78      | 63.747  | 36.9689       | 0.9733 | 26.00 | 0.969 |  |  |  |  |  |  |  |  |
| 15            | 23                         | 34              | 1              | 0.91         | 0.09      | 22.735  | 31.7938       | 0.9690 | 28.00 | 0.971 | 28                         | 64              | 2              | 0.75         | 0.25      | 56.682   | 37.825        | 0.9735 | 28.00 | 0.974 | 33                         | 19              | 3              | 0.20         | 0.80      | 99.621  | 37.5953       | 0.9737 | 28.00 | 0.970 |  |  |  |  |  |  |  |  |
| 16            | 24                         | 33              | 1              | 0.49         | 0.51      | 23.735  | 32.0683       | 0.9693 | 30.00 | 0.972 | 29                         | 62              | 2              | 0.73         | 0.27      | 58.682   | 37.4541       | 0.9737 | 30.00 | 0.974 | 34                         | 16              | 1              | 0.17         | 0.83      | 33.874  | 38.3737       | 0.9743 | 30.00 | 0.971 |  |  |  |  |  |  |  |  |
| 17            | 25                         | 32              | 1              | 0.48         | 0.52      | 24.735  | 32.3287       | 0.9695 | 32.00 | 0.973 | 30                         | 60              | 0              | 0.71         | 0.29      | 0.000    | 37.7245       | 0.9738 | 32.00 | 0.974 | 35                         | 15              | 0              | 0.16         | 0.84      | 0.000   | 38.6737       | 0.9745 | 32.00 | 0.973 |  |  |  |  |  |  |  |  |
| 18            | 26                         | 31              | 4              | 0.46         | 0.54      | 102.940 | 32.5786       | 0.9698 | 34.00 | 0.974 | 31                         | 60              | 1              | 0.71         | 0.29      | 31.941   | 37.7245       | 0.9738 | 34.00 | 0.974 | 36                         | 15              | 1              | 0.16         | 0.84      | 25.874  | 38.6737       | 0.9745 | 34.00 | 0.974 |  |  |  |  |  |  |  |  |
| 19            | 27                         | 27              | 1              | 0.40         | 0.60      | 26.735  | 33.9868       | 0.9707 | 36.00 | 0.974 | 32                         | 59              | 1              | 0.69         | 0.31      | 32.341   | 37.9327       | 0.9739 | 36.00 | 0.974 | 37                         | 14              | 0              | 0.15         | 0.85      | 0.000   | 38.8737       | 0.9746 | 36.00 | 0.975 |  |  |  |  |  |  |  |  |
| 20            | 28                         | 26              | 6              | 0.39         | 0.61      | 166.410 | 33.8503       | 0.9709 | 38.00 | 0.975 | 33                         | 58              | 1              | 0.68         | 0.32      | 33.341   | 37.9274       | 0.9740 | 38.00 | 0.975 | 38                         | 14              | 0              | 0.15         | 0.85      | 0.000   | 38.8737       | 0.9746 | 38.00 | 0.976 |  |  |  |  |  |  |  |  |
| 21            | 29                         | 20              | 0              | 0.30         | 0.70      | 0.000   | 35.8849       | 0.9724 | 40.00 | 0.975 | 34                         | 57              | 1              | 0.67         | 0.33      | 34.341   | 38.0078       | 0.9740 | 40.00 | 0.975 | 39                         | 14              | 14             | 0.15         | 0.85      | 544.232 | 38.8737       | 0.9746 | 40.00 | 0.976 |  |  |  |  |  |  |  |  |
| 22            | 30                         | 20              | 1              | 0.30         | 0.70      | 29.735  | 35.6849       | 0.9724 | 42.00 | 0.976 | 35                         | 56              | 3              | 0.66         | 0.34      | 70.682   | 38.0733       | 0.9741 | 42.00 | 0.975 | 40                         | 0               | 0              | 0.00         | 1.00      | 0.000   | 0.000         | 0.000  | 42.00 | 0.977 |  |  |  |  |  |  |  |  |
| 23            | 31                         | 19              | 0              | 0.28         | 0.72      | 0.000   | 35.9981       | 0.9726 | 44.00 | 0.976 | 36                         | 54              | 3              | 0.64         | 0.36      | 109.024  | 38.1745       | 0.9741 | 44.00 | 0.975 | 40                         | 0               | 0              | 0.00         | 1.00      | 0.000   | 0.000         | 0.000  | 44.00 | 0.978 |  |  |  |  |  |  |  |  |
| 24            | 32                         | 19              | 1              | 0.28         | 0.72      | 31.735  | 35.9981       | 0.9726 | 46.00 | 0.977 | 37                         | 51              | 3              | 0.60         | 0.40      | 112.024  | 38.2824       | 0.9742 | 46.00 | 0.975 | 40                         | 0               | 0              | 0.00         | 1.00      | 0.000   | 0.000         | 0.000  | 46.00 | 0.979 |  |  |  |  |  |  |  |  |
| 25            | 33                         | 18              | 1              | 0.27         | 0.73      | 32.735  | 36.2489       | 0.9728 | 48.00 | 0.977 | 38                         | 48              | 48             | 0.56         | 0.44      | 1840.376 | 38.3412       | 0.9743 | 48.00 | 0.976 | 40                         | 0               | 0              | 0.00         | 1.00      | 0.000   | 0.000         | 0.000  | 48.00 | 0.980 |  |  |  |  |  |  |  |  |
| 26            | 34                         | 17              | 0              | 0.25         | 0.75      | 0.000   | 36.4468       | 0.9729 | 50.00 | 0.978 | 39                         | 48              | 0              | 0.00         | 1.00      | 0.000    | 0.000         | 0.000  | 50.00 | 0.976 | 40                         | 0               | 0              | 0.00         | 1.00      | 0.000   | 0.000         | 0.000  | 50.00 | 0.980 |  |  |  |  |  |  |  |  |
| 27            | 35                         | 17              | 2              | 0.25         | 0.75      | 69.470  | 36.4468       | 0.9729 | 52.00 | 0.978 | 40                         | 47              | 0              | 0.00         | 1.00      | 0.000    | 0.000         | 0.000  | 52.00 | 0.976 | 40                         | 0               | 0              | 0.00         | 1.00      | 0.000   | 0.000         | 0.000  | 52.00 | 0.981 |  |  |  |  |  |  |  |  |
| 28            | 36                         | 15              | 1              | 0.22         | 0.78      | 35.735  | 36.6683       | 0.9731 | 54.00 | 0.979 | 41                         | 47              | 0              | 0.00         | 1.00      | 0.000    | 0.000         | 0.000  | 54.00 | 0.976 | 40                         | 0               | 0              | 0.00         | 1.00      | 0.000   | 0.000         | 0.000  | 54.00 | 0.982 |  |  |  |  |  |  |  |  |
| 29            | 37                         | 14              | 14             | 0.21         | 0.79      | 144.389 | 36.7349       | 0.9731 | 56.00 | 0.979 | 42                         | 47              | 0              | 0.00         | 1.00      | 0.000    | 0.000         | 0.000  | 56.00 | 0.976 | 40                         | 0               | 0              | 0.00         | 1.00      | 0.000   | 0.000         | 0.000  | 56.00 | 0.982 |  |  |  |  |  |  |  |  |
| 30            | 51                         | 0               | 0              | 0.00         | 1.00      | 0.000   | 0.000         | 0.000  | 0.000 | 0.000 | 0                          | 0               | 0              | 0.00         | 1.00      | 0.000    | 0.000         | 0.000  | 0.000 | 0.000 | 0                          | 0               | 0              | 0.00         | 1.00      | 0.000   | 0.000         | 0.000  | 0.000 | 0.000 |  |  |  |  |  |  |  |  |
| 31            | Age moyen des femelles à 0 |                 |                |              |           |         |               |        |       |       | Age moyen des femelles à 0 |                 |                |              |           |          |               |        |       |       | Age moyen des femelles à 0 |                 |                |              |           |         |               |        |       |       |  |  |  |  |  |  |  |  |
| 32            | 7,73                       |                 |                |              |           |         |               |        |       |       | 11,20                      |                 |                |              |           |          |               |        |       |       | 17,87                      |                 |                |              |           |         |               |        |       |       |  |  |  |  |  |  |  |  |
|               | Durée de vie Moyenne       |                 |                |              |           |         |               |        |       |       | 18,26                      |                 |                |              |           |          |               |        |       |       | 36,55                      |                 |                |              |           |         |               |        |       |       |  |  |  |  |  |  |  |  |
|               |                            |                 |                |              |           |         |               |        |       |       |                            |                 |                |              |           |          |               |        |       |       | Durée de vie Moyenne       |                 |                |              |           |         |               |        |       |       |  |  |  |  |  |  |  |  |
|               |                            |                 |                |              |           |         |               |        |       |       |                            |                 |                |              |           |          |               |        |       |       | 7,49                       |                 |                |              |           |         |               |        |       |       |  |  |  |  |  |  |  |  |

| 24°C           |              |                    |             |                |       |                  |                          |        |                          | 27°C |       |  |  |  |  |  |  |  |  |  |
|----------------|--------------|--------------------|-------------|----------------|-------|------------------|--------------------------|--------|--------------------------|------|-------|--|--|--|--|--|--|--|--|--|
| Jours du suivi | Age femelles | nbre de fem paires | Nbre cumulé | Taux de parité | p     | Life Expectation | Expectation of infective | Life   | Expectation of infective |      |       |  |  |  |  |  |  |  |  |  |
| 1              | 2            | 0                  | 0           | 0.00           | 0.942 | 16.862           | 0.8                      | 16.012 |                          |      |       |  |  |  |  |  |  |  |  |  |
| 2              | 3            | 0                  | 0           | 0.00           | 0.947 | 18.321           | 2.3                      |        |                          |      |       |  |  |  |  |  |  |  |  |  |
| 3              | 4            | 0                  | 0           | 0.00           | 0.950 | 19.513           | 3.5                      |        |                          |      |       |  |  |  |  |  |  |  |  |  |
| 4              | 5            | 0                  | 0           | 0.00           | 0.953 | 20.548           | 4.5                      |        |                          |      |       |  |  |  |  |  |  |  |  |  |
| 5              | 6            | 0                  | 0           | 0.00           | 0.955 | 21.476           | 5.5                      |        |                          |      |       |  |  |  |  |  |  |  |  |  |
| 6              | 7            | 0                  | 0           | 0.00           | 0.956 | 22.328           | 6.3                      |        |                          |      |       |  |  |  |  |  |  |  |  |  |
| 7              | 8            | 6                  | 6           | 0.07           | 0.958 | 23.120           | 7.1                      |        |                          |      |       |  |  |  |  |  |  |  |  |  |
| 8              | 9            | 9                  | 15          | 0.19           | 0.959 | 23.866           | 7.9                      |        |                          |      |       |  |  |  |  |  |  |  |  |  |
| 9              | 10           | 10                 | 25          | 0.31           | 0.960 | 24.575           | 8.6                      |        |                          |      |       |  |  |  |  |  |  |  |  |  |
| 10             | 11           | 0                  | 25          | 0.31           | 0.961 | 25.252           | 9.2                      |        |                          |      |       |  |  |  |  |  |  |  |  |  |
| 11             | 12           | 2                  | 27          | 0.33           | 0.962 | 25.903           | 9.9                      |        |                          |      |       |  |  |  |  |  |  |  |  |  |
| 12             | 13           | 1                  | 28          | 0.35           | 0.963 | 26.532           | 10.5                     |        |                          |      |       |  |  |  |  |  |  |  |  |  |
| 13             | 14           | 0                  | 28          | 0.35           | 0.964 | 27.141           | 11.1                     |        |                          |      |       |  |  |  |  |  |  |  |  |  |
| 14             | 15           | 0                  | 28          | 0.35           | 0.965 | 27.734           | 11.7                     |        |                          |      |       |  |  |  |  |  |  |  |  |  |
| 15             | 16           | 0                  | 28          | 0.35           | 0.965 | 28.311           | 12.3                     |        |                          |      |       |  |  |  |  |  |  |  |  |  |
| 16             | 17           | 0                  | 28          | 0.35           | 0.966 | 28.876           | 12.9                     |        |                          |      |       |  |  |  |  |  |  |  |  |  |
| 17             | 18           | 0                  | 28          | 0.35           | 0.967 | 29.429           | 13.4                     |        |                          |      |       |  |  |  |  |  |  |  |  |  |
| 18             | 19           | 0                  | 28          | 0.35           | 0.967 | 29.972           | 14.0                     |        |                          |      |       |  |  |  |  |  |  |  |  |  |
| 19             | 20           | 0                  | 28          | 0.35           | 0.968 | 30.505           | 14.5                     |        |                          |      |       |  |  |  |  |  |  |  |  |  |
| 20             | 21           | 0                  | 28          | 0.35           | 0.968 | 31.030           | 15.0                     |        |                          |      |       |  |  |  |  |  |  |  |  |  |
| 21             | 22           | 1                  | 29          | 0.36           | 0.969 | 31.547           | 15.5                     |        |                          |      |       |  |  |  |  |  |  |  |  |  |
|                | Model        |                    |             |                |       |                  |                          |        |                          |      | Model |  |  |  |  |  |  |  |  |  |

| 27°C           |              |                    |             |                |       |                  |                          |        |                          | 30°C |  |  |  |  |  |  |  |  |  |
|----------------|--------------|--------------------|-------------|----------------|-------|------------------|--------------------------|--------|--------------------------|------|--|--|--|--|--|--|--|--|--|
| Jours du suivi | Age femelles | nbre de fem paires | Nbre cumulé | Taux de parité | p     | Life Expectation | Expectation of infective | Life   | Expectation of infective |      |  |  |  |  |  |  |  |  |  |
| 1              | 2            | 0                  | 0           | 0.00           | 0.964 | 27.091           | 16.4                     | 10.670 |                          |      |  |  |  |  |  |  |  |  |  |
| 2              | 3            | 0                  | 0           | 0.00           | 0.965 | 28.283           | 17.6                     |        |                          |      |  |  |  |  |  |  |  |  |  |
| 3              | 4            | 1                  | 1           | 0.01           | 0.966 | 29.194           | 18.5                     |        |                          |      |  |  |  |  |  |  |  |  |  |
| 4              | 5            | 6                  | 7           | 0.08           | 0.967 | 29.940           | 19.3                     |        |                          |      |  |  |  |  |  |  |  |  |  |
| 5              | 6            | 15                 | 22          | 0.26           | 0.968 | 30.578           | 19.9                     |        |                          |      |  |  |  |  |  |  |  |  |  |
| 6              | 7            | 9                  | 31          | 0.36           | 0.968 | 31.140           | 20.5                     |        |                          |      |  |  |  |  |  |  |  |  |  |
| 7              | 8            | 9                  | 40          | 0.47           | 0.969 | 31.642           | 21.0                     |        |                          |      |  |  |  |  |  |  |  |  |  |
| 8              | 9            | 9                  | 49          | 0.58           | 0.969 | 32.099           | 21.4                     |        |                          |      |  |  |  |  |  |  |  |  |  |
| 9              | 10           | 1                  | 50          | 0.59           | 0.970 | 32.519           | 21.8                     |        |                          |      |  |  |  |  |  |  |  |  |  |
| 10             | 11           | 1                  | 51          | 0.60           | 0.970 | 32.908           | 22.2                     |        |                          |      |  |  |  |  |  |  |  |  |  |
| 11             | 12           | 0                  | 51          | 0.60           | 0.970 | 33.271           | 22.6                     |        |                          |      |  |  |  |  |  |  |  |  |  |
| 12             | 13           | 1                  | 52          | 0.61           | 0.971 | 33.612           | 22.9                     |        |                          |      |  |  |  |  |  |  |  |  |  |
| 13             | 14           | 2                  | 54          | 0.64           | 0.971 | 33.935           | 23.3                     |        |                          |      |  |  |  |  |  |  |  |  |  |
| 14             | 15           | 2                  | 56          | 0.66           | 0.971 |                  |                          |        |                          |      |  |  |  |  |  |  |  |  |  |
