# Supplementary material for: Parity and Longevity of Aedes aegypti According to Temperatures in Controlled Conditions and Consequences on Dengue Transmission Risks
Source: PubMed Central journal article supplement (PMC4530937; doi:10.1371/journal.pone.0135489), 2015-08-10
Supplement: pone.0135489.s008.pdf [file pone.0135489.s008.pdf]

---

|                                                   | Temperatures (°C) |           |           |
|---------------------------------------------------|-------------------|-----------|-----------|
|                                                   | <b>24</b>         | <b>27</b> | <b>30</b> |
| Females taking 1 blood-meal (%)                   | 60%               | 86%       | 96%       |
| Females taking 2 blood-meals and having 2 GC* (%) | 28%               | 43%       | 39%       |
| potentially able to transmit the virus (%)        | 28,0%             | 43,0%     | 39,0%     |

---

\* GC = Gonotrophic Cycle
